# Supplementary material
Source: publisher figshare collection journal article supplement (https://tandf.figshare.com/ndownloader/files/12753053)
Supplement: Supplementary file 1 [file 12753053]

**Technical Appendix**

Supplementary Information
